# Supplementary material for: Genome-wide identification, characterization, interaction network and expression profile of GAPDH gene family in sweet orange (Citrus sinensis)
Source: PeerJ. 2019 Nov 14;7:e7934. doi: 10.7717/peerj.7934 (PMC6858985; doi:10.7717/peerj.7934)
Supplement: Supplemental Information 7 [file peerj-07-7934-s007.xls]

## Sheet: Sheet1
Table S1. Basic information of CsGAPDH family
Gene Symbol	Gene Model	Chrome	location
CsGAPDH1	Cs7g10220	7	ch7:6,549,323..6,552,271
CsGAPDH2	Cs5g06870	5	ch5:4,315,647..4,319,814
CsGAPDH3	Cs2g24610	2	ch2:23,762,198..23,764,175
CsGAPDH4	orange1.1t03263	un
CsGAPDH5	Cs3g27520	3	chr3:28,477,412..28,480,796
CsGAPDH6	Cs2g14940	2	chr2:11,828,880..11,831,301
