# Supplementary material for: Genome-wide identification, characterization, interaction network and expression profile of GAPDH gene family in sweet orange (Citrus sinensis)
Source: PeerJ. 2019 Nov 14;7:e7934. doi: 10.7717/peerj.7934 (PMC6858985; doi:10.7717/peerj.7934)
Supplement: Supplemental Information 8 [file peerj-07-7934-s008.xls]

## Sheet: Sheet1
Table S2.List of primer sequence
Primers	Sequence(5'-3')
CsGAPDH1-qRT-F	ATCAATGGCCGGAGACAAGAA
CsGAPDH1-qRT-R	GCTCCACATCATCCCTCTGG
CsGAPDH2-qRT-F	ATGCCAAGGCTGGTATTGCT
CsGAPDH2-qRT-R	ACGAGTACTGTAGCCCCACT
CsGAPDH3-qRT-F	GCTCTCAAGGAGGCATCTCAA
CsGAPDH3-qRT-R	GCCTTGGCGTCAAAAATGCT
CsGAPDH4-qRT-F	TCCTCAGATCTACGGCCTCC
CsGAPDH4-qRT-R	AGTCGATGATCCCTTGACGC
CsGAPDH5-qRT-F	TCAATGCTCCACCAAGAGGC
CsGAPDH5-qRT-R	TAGCACCAGTGGCGTATGTC
CsGAPDH6-qRT-F	GTCTACGCAACTCTGCAAGC
CsGAPDH6-qRT-R	TGCTGCTTCCTAAAGCAGAGG
Csactin-qRT-F	CCAAGCAGCATGAAGATCAA
Csactin-qRT-R	ATCTGCTGGAAGGTGCTGAG
CsGAPDH1-GFP-F	ATAAGCTTGATATCGAATTCATGGCCGGAGACAAGAAGAT
CsGAPDH1-GFP-R	CCCCCGGGCTGCAGGAATTCTGCTTGAGTCTTTGCCA
CsGAPDH2-GFP-F	ATAAGCTTGATATCGAATTCATGGGGAAGGTCAAGATCGG
CsGAPDH2-GFP-R	CCCCCGGGCTGCAGGAATTCCTGGGTCTTCGACATGT
CsGAPDH5-GFP-F	ATAAGCTTGATATCGAATTCATGGCCAGTCACTCAGCTCT
CsGAPDH5-GFP-R	CCCCCGGGCTGCAGGAATTCACGACTGAAACATTTGG
CsGAPDH6-GFP-F	ATAAGCTTGATATCGAATTCATGGCTTCGGCCACTCTCTC
CsGAPDH6-GFP-R	CCCCCGGGCTGCAGGAATTCCTTCCAGTTGTTGGCAA
